# Supplementary material for: From proteins to polysaccharides: lifestyle and genetic evolution of Coprothermobacter proteolyticus
Source: PubMed Central journal article supplement — ISME J. 2018 Oct 12;13(3):603–17. doi: 10.1038/s41396-018-0290-y (PMC6461833; doi:10.1038/s41396-018-0290-y), 2018-10-12
Supplement: 41396_2018_290_MOESM1_ESM.pdf [file 41396_2018_290_MOESM1_ESM.pdf]

1 **SUPPLEMENTARY MATERIAL for:**

2

3 **From proteins to polysaccharides; lifestyle and genetic evolution of**  
4 ***Coprothermobacter proteolyticus*.**

5

6 B.J. Kunath, F. Delogu, A.E. Naas, M.Ø. Arntzen, V.G.H. Eijsink, B. Henrissat, T.R. Hvidsten, P.B.  
7 Pope

8

9 This PDF file includes:

10 I. Supplementary Figures and Legends

11 II. Supplementary Tables and Legends

12 III. References cited in the Supplementary Material

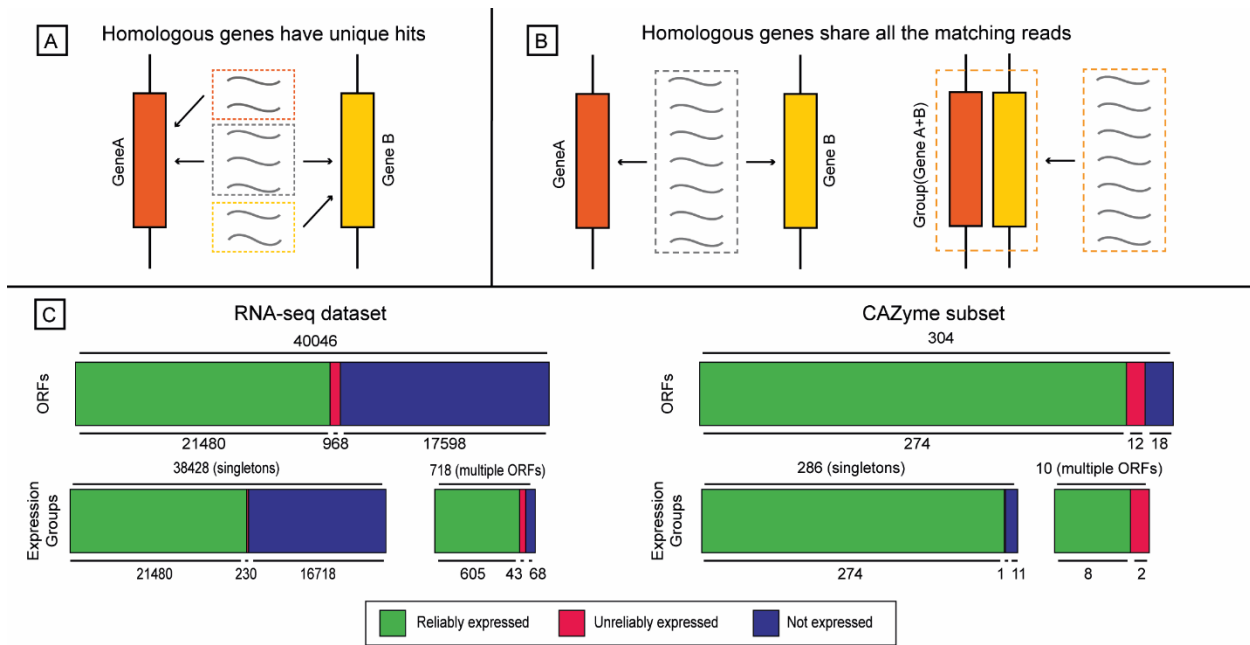

13  
14  
15  
16  
17  
18  
19  
20  
21  
22  
23  
24

**Supplementary Figure 1. Workflow used for RNA-seq quantification and generation of expression groups.** **A** and **B** illustrate (respectively) the grouping of genes when unique reads are present (**A**) and when there are not (**B**). In **A**, genes A and B are homologous, and a set of reads maps uniquely to either gene A or to gene B. The subsequent unique sets can be used to sort the ambiguous reads that map on both genes. In **B**, genes A and B are homologous and no unique reads map exclusively to either gene. The two genes cannot be separated and thus their expression cannot be reliably estimated. Instead of losing the information, the genes are merged into an expression group. **C** and **D** represent the effect of collapsing genes into expression groups on the total dataset (**C**), and the reduced dataset focused on CAZymes (**D**).

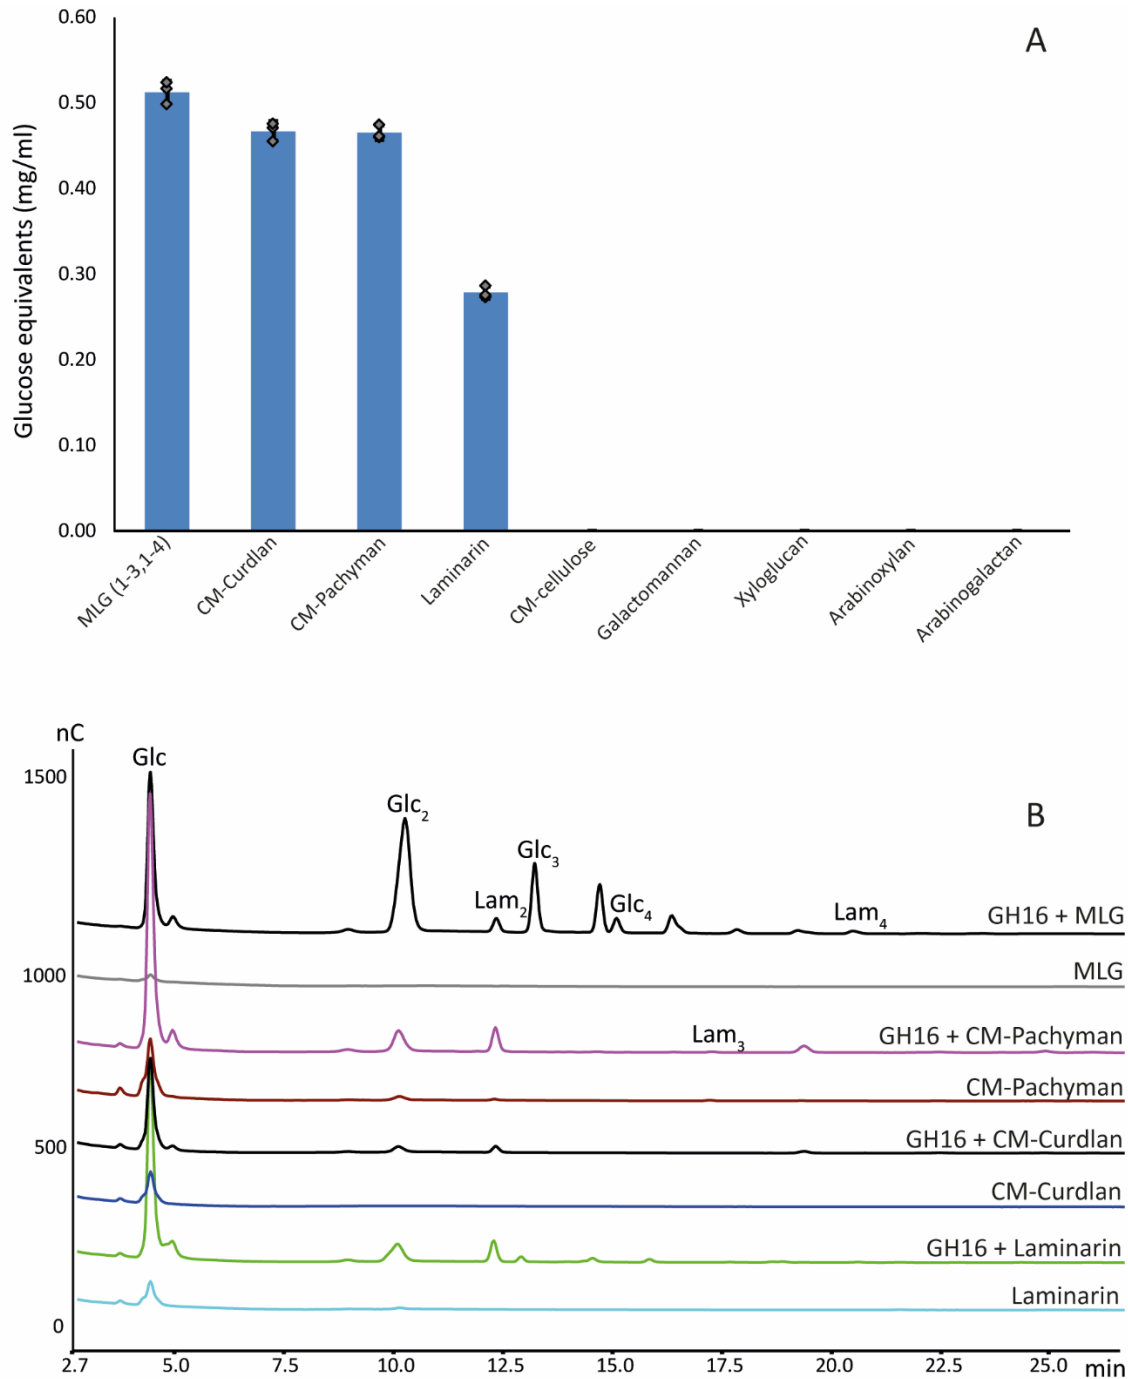

25  
 26 **Supplementary Figure 2. Characterization of endo- $\beta$ -1,3-1,4-gucanase activity by a**  
 27 **GH16 CAZyme encoded in BWF2A and SW3C.**

28 **A.** Degradation of soluble polysaccharides by the GH16 enzyme, measured as reducing ends  
 29 (glucose equivalents) recovered. Assays were performed at 50°C with 1mg/ml substrate and  
 30 1 $\mu$ M enzyme for one hour. Reducing ends were quantified by the DNS-method against a  
 31 standard curve of glucose. Error bars represent standard deviations among three replicates.  
 32 The four substrates that yielded activity contain  $\beta$ -1,3 (pachyman, curdlan, laminarin) or  
 33 mixed  $\beta$ -1,3-1,4-linked glucans (MLG). No activity was exhibited on cellulose ( $\beta$ -1,4 linked

34 glucose), xyloglucans ( $\beta$ -1,4 linked glucose), galactomannan ( $\beta$ -1,4 linked mannose),  
35 arabinoxylans ( $\beta$ -1,4 linked xylose) or arabinogalactans ( $\beta$ -1,4 linked galactose). **B.**  
36 Degradation products from soluble polysaccharides containing  $\beta$ -1,3-glucan linkages by the  
37 GH16 enzyme, analyzed by High-pH anion-exchange chromatography–pulsed amperometric  
38 detection (HPAEC-PAD). Identified peaks are annotated as Glc (glucose and cello-oligos) or  
39 Lam (laminari-oligos), with their degree of polymerization depicted in subscript. X-axis:  
40 retention time in minutes; Y-axis: signal strength (nano-coulombs). For clarity, the  
41 chromatograms are shown without the buffer peaks in  $t=0 - 2.7$  min, and from  $t=27 - 50$  min  
42 where no peaks were observed. Assays were performed as described above, but reactions  
43 were stopped by the addition of NaOH to a final concentration of 0.1M before analysis. CM:  
44 Carboxymethyl.

45 **Supplementary Table 1. Anaerobic biogas reactors with reported *Coprothermobacter***  
 46 ***proteolyticus*-affiliated populations.** Date, location, reactor substrate and the presence  
 47 /absence of cellulose are listed. The SEM1b consortium from this study is highlighted in  
 48 yellow.

| Date | Location     | Substrate                                | Cellulose   | Hemicellulose | 16S | Reference                        |
|------|--------------|------------------------------------------|-------------|---------------|-----|----------------------------------|
| 2018 | Norway I     | Cellulose (C)                            | YES (88.3%) | YES (9.3 %)   | YES | This study                       |
| 2017 | Denmark      | Food waste, Grass clippings (FW, C)      | YES         | YES           | YES | (Fitamo <i>et al.</i> , 2017)    |
| 2017 | Singapore    | wastewater treatment plant sludge (S)    | YES         | n.a.          | YES | (Chen <i>et al.</i> , 2017)      |
| 2017 | Japan I      | Acetate/sludge (Ac/S)                    | NO          | NO            | YES | (Kouzuma <i>et al.</i> , 2017)   |
| 2016 | Norway II    | Food waste (FW)                          | YES         | YES           | YES | (Hagen <i>et al.</i> , 2017)     |
| 2016 | S. Korea     | Seaweeds (SW)                            | YES         | NO            | YES | (Azizi <i>et al.</i> , 2016)     |
| 2016 | Australia I  | wastewater treatment plant sludge (S)    | n.a.        | n.a.          | YES | (Ho <i>et al.</i> , 2016)        |
| 2016 | China I      | Food waste (FW)                          | Yes         | n.a.          | YES | (Chen <i>et al.</i> , 2016)      |
| 2015 | Michigan     | wastewater treatment plant sludge (S)    | n.a.        | n.a.          | YES | (Sun <i>et al.</i> , 2015)       |
| 2015 | China II     | wastewater treatment plant sludge (S)    | n.a.        | n.a.          | YES | (Yu <i>et al.</i> , 2015)        |
| 2015 | Roma Italy   | wastewater treatment plant sludge (S)    | NO          | NO            | YES | (Gagliano <i>et al.</i> , 2015)  |
| 2014 | France       | Municipal Solid Waste / Office Paper (C) | YES (70%)   | YES (30%)     | YES | (Lü <i>et al.</i> , 2014)        |
| 2013 | Australia II | wastewater treatment plant sludge (S)    | n.a.        | n.a.          | YES | (Pervin <i>et al.</i> , 2013)    |
| 2008 | Japan II     | wastewater treatment plant sludge (S)    | NO          | NO            | YES | (Kobayashi <i>et al.</i> , 2008) |

49 **Supplementary Table 2. 16S rRNA analysis of the SEM1b consortium.** Taxonomic  
 50 composition of two separate samples (D1B and D2B), collected from a continuous SEM1b  
 51 culture. D2B is 15 generations older than D1B. Consensus lineage was determined via QIIME.  
 52 Closest relatives were determined using BLASTn.

| OTU ID  | D1B (%)          | D2B (%)          | Average (%) | Consensus Lineage             | Closest relative (BlastN)       |
|---------|------------------|------------------|-------------|-------------------------------|---------------------------------|
| OTU-1.1 | 55.3 (+/- 2.4)   | 45.2 (+/- 0.2)   | 50.2        | <i>Clostridium</i>            | <i>C. thermocellum</i>          |
| OTU-2.1 | 26.5 (+/- 1.3)   | 31.4 (+/- 0.1)   | 29          | <i>Coprothermobacter</i>      | <i>C. proteolyticus</i>         |
| OTU-2.2 | 10.6 (+/- 0.3)   | 12.6 (+/- 0.1)   | 11.6        | <i>Coprothermobacter</i>      | <i>C. proteolyticus</i>         |
| OTU-3.1 | 0                | 6.9 (+/- 0.04)   | 3.5         | <i>Anaerobaculum</i>          | <i>Acetomicrobium mobile</i>    |
| OTU-4   | 1.5 (+/- 0.2)    | 2.8 (+/- 0.1)    | 2.2         | <i>Tepidimicrobium</i>        | <i>Tepidimicrobium</i>          |
| OTU-5   | 3.7 (+/- 1)      | 0                | 1.9         | <i>Clostridium</i>            | <i>Uncultured bacterium</i>     |
| OTU-2.3 | 0.4 (+/- 0.1)    | 0.4 (+/- 0.03)   | 0.4         | <i>Coprothermobacter</i>      | <i>C. proteolyticus</i>         |
| OTU-3.2 | 0                | 0.6 (+/- 0)      | 0.3         | <i>Anaerobaculum</i>          | <i>Uncultured Anaerobaculum</i> |
| OTU-6.1 | 1.2 (+/- 0.2)    | 0                | 0.6         | <i>Thermoanaerobacterales</i> | <i>Tepidanaerobacter</i>        |
| OTU-6.2 | 0.7 (+/- 0.2)    | 0                | 0.35        | <i>Thermoanaerobacterales</i> | <i>Tepidanaerobacter</i>        |
| OTU-1.2 | 0.1 (+/- 0)      | 0                | 0.05        | <i>Clostridium</i>            | <i>C. thermocellum</i>          |
| OTU-7   | 0.02 (+/- 0.006) | 0.02 (+/- 0.005) | 0.02        | <i>Methanothermobacter</i>    | <i>Methanothermobacter</i>      |

53 **Supplementary Table 3. CheckM and ANI analyses.** Statistics of the metagenome-  
 54 recovered genomes (MAGs) from the SEM1b consortium as assessed by CheckM and average  
 55 nucleotide identities (ANI), which were calculated against their closest relative.

| MAG Id          | Completeness | Contamination | Heterogeneity | Size (Mb) | Closest relative                                        | ANI (%) |
|-----------------|--------------|---------------|---------------|-----------|---------------------------------------------------------|---------|
| RCL01           | 98.7         | 0.0           | 0.0           | 3.2       | <i>C. thermocellum</i><br>ATCC27405                     | 99.8    |
| COPR1           | 98.2         | 5.4           | 100.0         | 1.8       | <i>C proteolyticus</i> DSM5265                          | 97.8    |
| COPR2           | 0.0          | 0.0           | 0.0           | 0.3       | n.a.                                                    | n.a.    |
| COPR3           | 0.0          | 0.0           | 0.0           | 0.3       | n.a.                                                    | n.a.    |
| SYNG1           | 86.4         | 0.0           | 0.0           | 1.4       | <i>Acetomicrobium mobile</i><br>DSM13181                | 98.6    |
| SYNG2           | 13.6         | 5.1           | 100.0         | 0.8       | n.a.                                                    | n.a.    |
| TISS1           | 97.9         | 0.0           | 0.0           | 2.1       | <i>Tepidimicrobium</i><br><i>xylanilyticum</i> DSM23310 | 75.1    |
| TEPI1           | 82.2         | 1.7           | 0.0           | 1.9       | <i>Tepidanaerobacter</i><br><i>acetatoxydans</i> Re1    | 74.4    |
| TEPI2           | 87.0         | 11.8          | 14.3          | 2.4       | <i>Tepidanaerobacter</i><br><i>acetatoxydans</i> Re1    | 74.6    |
| CLOS1           | 98.6         | 1.4           | 0.0           | 3.0       | <i>Clostridium</i><br><i>Stercorarium</i> DSM8532       | 79.1    |
| METH1           | 99.9         | 0.0           | 0.0           | 1.7       | <i>Methanothermobacter</i><br><i>thermautrophicus</i>   | 98.2    |
| <i>Unbinned</i> |              |               |               | 7.7       | n.a.                                                    | n.a.    |

56 **Supplementary Table 4. CAZyme profiles for selected MAGs and genomes.** The total  
57 number of annotated domains per CAZy family for each SEM1b MAG/genome are listed. \*  
58 CAZyme profile for *C. proteolyticus* DSM 5265



59 **Supplementary Table 5. Clusters of expression groups.** The table shows the gene IMG ID  
60 and the CAZy family assignment of each expression group together with the genome and  
61 cluster. Groups composed of several ORFs contain a “+” between the gene IDs and the names  
62 of the organisms.

| Expression Groups (Gene IMG ID)                      | CAZy    | Genome | Cluster |
|------------------------------------------------------|---------|--------|---------|
| <b>Cluster I: 121 expression groups, 143 domains</b> |         |        |         |
| Ga0196617_10021811                                   | CE8     | RCL01  | I       |
| Ga0196617_10021811                                   | DOC1    | RCL01  | I       |
| Ga0196617_1000051                                    | GH51    | CLOS1  | I       |
| Ga0196617_10000511                                   | GH138   | CLOS1  | I       |
| Ga0196617_10000512                                   | GH29    | CLOS1  | I       |
| Ga0196617_100005134                                  | CE4     | CLOS1  | I       |
| Ga0196617_10000516                                   | GH2     | CLOS1  | I       |
| Ga0196617_10000517                                   | CE15    | CLOS1  | I       |
| Ga0196617_100005175                                  | GH31    | CLOS1  | I       |
| Ga0196617_10000518                                   | GH95    | CLOS1  | I       |
| Ga0196617_100005181                                  | CBM25   | CLOS1  | I       |
| Ga0196617_100005192                                  | GH51    | CLOS1  | I       |
| Ga0196617_100005195                                  | SLH     | CLOS1  | I       |
| Ga0196617_100005195                                  | SLH     | CLOS1  | I       |
| Ga0196617_100005195                                  | SLH     | CLOS1  | I       |
| Ga0196617_10000520                                   | GH42    | CLOS1  | I       |
| Ga0196617_100005203                                  | GH2     | CLOS1  | I       |
| Ga0196617_10000534                                   | GH35    | CLOS1  | I       |
| Ga0196617_1000055                                    | GH36    | CLOS1  | I       |
| Ga0196617_1000056                                    | GH36    | CLOS1  | I       |
| Ga0196617_10000567                                   | GH13_31 | CLOS1  | I       |
| Ga0196617_10000568                                   | GH36    | CLOS1  | I       |
| Ga0196617_1000057                                    | GH105   | CLOS1  | I       |
| Ga0196617_10000579                                   | GH10    | CLOS1  | I       |
| Ga0196617_1000058                                    | GH3     | CLOS1  | I       |
| Ga0196617_10000586                                   | GH43    | CLOS1  | I       |
| Ga0196617_1000059                                    | GH31    | CLOS1  | I       |
| Ga0196617_100006118                                  | GH43    | CLOS1  | I       |
| Ga0196617_100006212                                  | CE8     | CLOS1  | I       |
| Ga0196617_10000638                                   | GH18    | CLOS1  | I       |
| Ga0196617_10000669                                   | GH88    | CLOS1  | I       |
| Ga0196617_100011180                                  | GH3     | CLOS1  | I       |
| Ga0196617_10001122                                   | GH36    | CLOS1  | I       |
| Ga0196617_10001539                                   | GH67    | CLOS1  | I       |
| Ga0196617_10001577                                   | CE4     | CLOS1  | I       |
| Ga0196617_10001596                                   | CE15    | CLOS1  | I       |
| Ga0196617_10001596                                   | SLH     | CLOS1  | I       |
| Ga0196617_10001596                                   | SLH     | CLOS1  | I       |

|                     |        |       |   |
|---------------------|--------|-------|---|
| Ga0196617_10001596  | SLH    | CLOS1 | I |
| Ga0196617_100018109 | GH133  | CLOS1 | I |
| Ga0196617_100018129 | GH2    | CLOS1 | I |
| Ga0196617_100018135 | CE4    | CLOS1 | I |
| Ga0196617_10001814  | CBM50  | CLOS1 | I |
| Ga0196617_10001876  | CE7    | CLOS1 | I |
| Ga0196617_100020114 | GH112  | CLOS1 | I |
| Ga0196617_100020115 | GH127  | CLOS1 | I |
| Ga0196617_100020127 | GH63   | CLOS1 | I |
| Ga0196617_10002033  | CBM48  | CLOS1 | I |
| Ga0196617_10002033  | GH13_9 | CLOS1 | I |
| Ga0196617_10002040  | GH29   | CLOS1 | I |
| Ga0196617_10002041  | GH95   | CLOS1 | I |
| Ga0196617_10002065  | GH43   | CLOS1 | I |
| Ga0196617_10002712  | GH2    | CLOS1 | I |
| Ga0196617_1000274   | GH23   | CLOS1 | I |
| Ga0196617_10002766  | GH38   | CLOS1 | I |
| Ga0196617_10002771  | GH105  | CLOS1 | I |
| Ga0196617_10002776  | GH105  | CLOS1 | I |
| Ga0196617_10002777  | CE12   | CLOS1 | I |
| Ga0196617_10002778  | GH105  | CLOS1 | I |
| Ga0196617_10002780  | GH140  | CLOS1 | I |
| Ga0196617_10002785  | GH78   | CLOS1 | I |
| Ga0196617_1000344   | CE9    | CLOS1 | I |
| Ga0196617_10003461  | GH2    | CLOS1 | I |
| Ga0196617_10003498  | GH38   | CLOS1 | I |
| Ga0196617_10003636  | GH43   | CLOS1 | I |
| Ga0196617_10003637  | GH43   | CLOS1 | I |
| Ga0196617_10003684  | CBM50  | CLOS1 | I |
| Ga0196617_10003684  | CBM50  | CLOS1 | I |
| Ga0196617_10003849  | GH15   | CLOS1 | I |
| Ga0196617_10003852  | GH95   | CLOS1 | I |
| Ga0196617_10003870  | GH3    | CLOS1 | I |
| Ga0196617_10003880  | GH2    | CLOS1 | I |
| Ga0196617_10005912  | GH28   | CLOS1 | I |
| Ga0196617_10005913  | GH105  | CLOS1 | I |
| Ga0196617_10005914  | GH43   | CLOS1 | I |
| Ga0196617_10005958  | GH39   | CLOS1 | I |
| Ga0196617_10005959  | GH95   | CLOS1 | I |
| Ga0196617_10006041  | GH130  | CLOS1 | I |
| Ga0196617_1000651   | CBM50  | CLOS1 | I |
| Ga0196617_10006557  | GH73   | CLOS1 | I |
| Ga0196617_10006557  | SLH    | CLOS1 | I |
| Ga0196617_10007036  | CBM50  | CLOS1 | I |

|                     |         |       |   |
|---------------------|---------|-------|---|
| Ga0196617_10007036  | CBM50   | CLOS1 | I |
| Ga0196617_10007036  | GH18    | CLOS1 | I |
| Ga0196617_10007049  | GH94    | CLOS1 | I |
| Ga0196617_1000758   | GH1     | CLOS1 | I |
| Ga0196617_10007748  | GH4     | CLOS1 | I |
| Ga0196617_10007750  | CBM66   | CLOS1 | I |
| Ga0196617_10009212  | GH13_18 | CLOS1 | I |
| Ga0196617_10009249  | GH2     | CLOS1 | I |
| Ga0196617_1001112   | GH42    | CLOS1 | I |
| Ga0196617_10011120  | GH3     | CLOS1 | I |
| Ga0196617_10011122  | GH130   | CLOS1 | I |
| Ga0196617_10011128  | GH88    | CLOS1 | I |
| Ga0196617_10011129  | GH88    | CLOS1 | I |
| Ga0196617_10011135  | GH78    | CLOS1 | I |
| Ga0196617_10011136  | GH3     | CLOS1 | I |
| Ga0196617_10011620  | GH43    | CLOS1 | I |
| Ga0196617_10011624  | GH105   | CLOS1 | I |
| Ga0196617_1001205   | GH4     | CLOS1 | I |
| Ga0196617_10015018  | GH51    | CLOS1 | I |
| Ga0196617_1001561   | DOC1    | CLOS1 | I |
| Ga0196617_10015626  | GH4     | CLOS1 | I |
| Ga0196617_1001563   | GH4     | CLOS1 | I |
| Ga0196617_1001793   | GH120   | CLOS1 | I |
| Ga0196617_10019216  | CBM50   | CLOS1 | I |
| Ga0196617_10019216  | CBM50   | CLOS1 | I |
| Ga0196617_10019218  | GH18    | CLOS1 | I |
| Ga0196617_10019320  | CBM6    | CLOS1 | I |
| Ga0196617_1002039   | SLH     | CLOS1 | I |
| Ga0196617_1002039   | SLH     | CLOS1 | I |
| Ga0196617_1002039   | SLH     | CLOS1 | I |
| Ga0196617_1002039   | CBM54   | CLOS1 | I |
| Ga0196617_10022114  | SLH     | CLOS1 | I |
| Ga0196617_10022114  | SLH     | CLOS1 | I |
| Ga0196617_10022114  | SLH     | CLOS1 | I |
| Ga0196617_10022114  | GH18    | CLOS1 | I |
| Ga0196617_1002911   | GH23    | CLOS1 | I |
| Ga0196617_10029410  | GH10    | CLOS1 | I |
| Ga0196617_1004705   | GH35    | CLOS1 | I |
| Ga0187557_1002153   | CE9     | BWF2A | I |
| Ga0187564_10677     | GH18    | SW3C  | I |
| Ga0196617_10006619  | GH23    | COPR1 | I |
| Ga0196617_1005697   | GH73    | COPR1 | I |
| Ga0196617_1009463   | CE9     | COPR1 | I |
| Ga0196617_100004229 | CBM50   | TISS1 | I |

|                                                             |          |              |     |
|-------------------------------------------------------------|----------|--------------|-----|
| Ga0196617_100007288                                         | GH3      | TISS1        | I   |
| Ga0196617_100007296                                         | CE4      | TISS1        | I   |
| Ga0196617_100010202                                         | GH144    | TISS1        | I   |
| Ga0196617_100010202                                         | GH94     | TISS1        | I   |
| Ga0196617_10001251                                          | CBM50    | TISS1        | I   |
| Ga0196617_10001251                                          | CBM50    | TISS1        | I   |
| Ga0196617_10001251                                          | CBM50    | TISS1        | I   |
| Ga0196617_10001251                                          | CBM50    | TISS1        | I   |
| Ga0196617_10002881                                          | CE4      | TISS1        | I   |
| Ga0196617_10003113                                          | GH18     | TISS1        | I   |
| Ga0196617_10004218                                          | CBM50    | TISS1        | I   |
| Ga0196617_10004240                                          | CE4      | TISS1        | I   |
| Ga0196617_10005467                                          | GH23     | TISS1        | I   |
| Ga0187557_1002248 + Ga0187564_10674                         | GH16     | BWF2A + SW3C | I   |
| Ga0187557_100434 + Ga0187564_10433                          | GH23     | BWF2A + SW3C | I   |
| Ga0187557_1002249 + Ga0187564_10675                         | GH3      | BWF2A + SW3C | I   |
| Ga0196617_10009442 + Ga0187564_10367                        | CBM66    | SW3C + COPR1 | I   |
| <b><u>Cluster II: 10 expression groups</u></b>              |          |              |     |
| Ga0187557_100243                                            | GH57     | BWF2A        | II  |
| Ga0187557_1002195                                           | CE4      | BWF2A        | II  |
| Ga0187557_100472                                            | GH13_m45 | BWF2A        | II  |
| Ga0187557_1004109                                           | GH23     | BWF2A        | II  |
| Ga0196617_10006233                                          | GH57     | COPR1        | II  |
| Ga0196617_10006234                                          | GH57     | COPR1        | II  |
| Ga0196617_10006658                                          | GH13_m45 | COPR1        | II  |
| Ga0196617_1001466                                           | GH23     | COPR1        | II  |
| Ga0196617_10031312                                          | CE4      | COPR1        | II  |
| Ga0187557_100244 + Ga0187564_103146                         | GH57     | BWF2A + SW3C | II  |
| <b><u>Cluster III: 10 expression groups, 13 domains</u></b> |          |              |     |
| Ga0196617_10001656                                          | DOC1     | RCL01        | III |
| Ga0196617_10002366                                          | GH1      | RCL01        | III |
| Ga0196617_10003575                                          | DOC1     | RCL01        | III |
| Ga0196617_1000454                                           | CE1      | RCL01        | III |
| Ga0196617_1000454                                           | CBM6     | RCL01        | III |
| Ga0196617_1000454                                           | DOC1     | RCL01        | III |
| Ga0196617_10009713                                          | CBM50    | RCL01        | III |
| Ga0196617_10012635                                          | CBM50    | RCL01        | III |
| Ga0196617_10012635                                          | CBM50    | RCL01        | III |
| Ga0187564_10322                                             | CE9      | SW3C         | III |
| Ga0187564_103147                                            | GH57     | SW3C         | III |
| Ga0187564_104108                                            | GH23     | SW3C         | III |
| Ga0196617_1002669                                           | GH4      | COPR3        | III |
| <b><u>Cluster IV: 11 expression groups, 13 domains</u></b>  |          |              |     |
| Ga0196617_10001933                                          | CBM25    | RCL01        | IV  |

|                                                           |          |              |    |
|-----------------------------------------------------------|----------|--------------|----|
| Ga0196617_10003643                                        | CE9      | CLOS1        | IV |
| Ga0187557_1003280                                         | GH73     | BWF2A        | IV |
| Ga0187564_10471                                           | GH13_m45 | SW3C         | IV |
| Ga0196617_1000499                                         | GH23     | COPR1        | IV |
| Ga0196617_1000628                                         | CE9      | COPR1        | IV |
| Ga0196617_1006112                                         | CE4      | COPR1        | IV |
| Ga0196617_10001250                                        | CBM50    | TISS1        | IV |
| Ga0196617_10001250                                        | CBM50    | TISS1        | IV |
| Ga0196617_10001250                                        | CBM50    | TISS1        | IV |
| Ga0187564_101146 + Ga0187557_1001161                      | GH23     | BWF2A + SW3C | IV |
| Ga0187557_1002314 + Ga0187564_106139                      | GH13_39  | BWF2A + SW3C | IV |
| Ga0187557_100270 + Ga0187564_103120                       | CE9      | BWF2A + SW3C | IV |
| <b><u>Cluster V: 28 expression groups, 58 domains</u></b> |          |              |    |
| Ga0196617_10001610                                        | CBM3     | RCL01        | V  |
| Ga0196617_10001610                                        | SLH      | RCL01        | V  |
| Ga0196617_10001610                                        | SLH      | RCL01        | V  |
| Ga0196617_10001610                                        | SLH      | RCL01        | V  |
| Ga0196617_10002319                                        | GH5      | RCL01        | V  |
| Ga0196617_10003979                                        | CBM50    | RCL01        | V  |
| Ga0196617_10004156                                        | DOC1     | RCL01        | V  |
| Ga0196617_10004178                                        | GH130    | RCL01        | V  |
| Ga0196617_10004620                                        | GH3      | RCL01        | V  |
| Ga0196617_10004621                                        | CBM3     | RCL01        | V  |
| Ga0196617_10004621                                        | CBM4     | RCL01        | V  |
| Ga0196617_10004635                                        | GH43     | RCL01        | V  |
| Ga0196617_10004635                                        | CBM6     | RCL01        | V  |
| Ga0196617_10004635                                        | CBM6     | RCL01        | V  |
| Ga0196617_10004635                                        | DOC1     | RCL01        | V  |
| Ga0196617_10004637                                        | CBM42    | RCL01        | V  |
| Ga0196617_10006310                                        | GH5_37   | RCL01        | V  |
| Ga0196617_10006312                                        | CBM16    | RCL01        | V  |
| Ga0196617_10006312                                        | CBM16    | RCL01        | V  |
| Ga0196617_1000638                                         | SLH      | RCL01        | V  |
| Ga0196617_1000638                                         | SLH      | RCL01        | V  |
| Ga0196617_1000638                                         | SLH      | RCL01        | V  |
| Ga0196617_1000638                                         | CBM54    | RCL01        | V  |
| Ga0196617_1000638                                         | GH16     | RCL01        | V  |
| Ga0196617_1000638                                         | CBM4     | RCL01        | V  |
| Ga0196617_1000638                                         | CBM4     | RCL01        | V  |
| Ga0196617_1000638                                         | CBM4     | RCL01        | V  |
| Ga0196617_1000638                                         | CBM4     | RCL01        | V  |
| Ga0196617_10007916                                        | CE1      | RCL01        | V  |
| Ga0196617_10007916                                        | CBM6     | RCL01        | V  |
| Ga0196617_10007916                                        | DOC1     | RCL01        | V  |

|                                                              |       |       |    |
|--------------------------------------------------------------|-------|-------|----|
| Ga0196617_10007916                                           | GH10  | RCL01 | V  |
| Ga0196617_1000831                                            | DOC1  | RCL01 | V  |
| Ga0196617_10012135                                           | GH9   | RCL01 | V  |
| Ga0196617_10012135                                           | CBM3  | RCL01 | V  |
| Ga0196617_10012135                                           | DOC1  | RCL01 | V  |
| Ga0196617_10012136                                           | DOC1  | RCL01 | V  |
| Ga0196617_10012833                                           | CBM3  | RCL01 | V  |
| Ga0196617_10013919                                           | GH16  | RCL01 | V  |
| Ga0196617_10013919                                           | DOC1  | RCL01 | V  |
| Ga0196617_10015134                                           | DOC1  | RCL01 | V  |
| Ga0196617_10024516                                           | CE4   | RCL01 | V  |
| Ga0196617_10024517                                           | GH11  | RCL01 | V  |
| Ga0196617_10024517                                           | CBM6  | RCL01 | V  |
| Ga0196617_10024517                                           | DOC1  | RCL01 | V  |
| Ga0196617_10024518                                           | GH11  | RCL01 | V  |
| Ga0196617_10024518                                           | CBM6  | RCL01 | V  |
| Ga0196617_10024518                                           | DOC1  | RCL01 | V  |
| Ga0196617_1006901                                            | GH11  | RCL01 | V  |
| Ga0196617_100005248                                          | CBM22 | CLOS1 | V  |
| Ga0196617_100005248                                          | CBM22 | CLOS1 | V  |
| Ga0196617_100005248                                          | GH10  | CLOS1 | V  |
| Ga0196617_100005248                                          | CBM9  | CLOS1 | V  |
| Ga0196617_10000543                                           | GH130 | CLOS1 | V  |
| Ga0196617_100006227                                          | GH10  | CLOS1 | V  |
| Ga0196617_100006228                                          | GH30  | CLOS1 | V  |
| Ga0196617_100006228                                          | CBM22 | CLOS1 | V  |
| Ga0196617_10001149                                           | GH31  | CLOS1 | V  |
| <b><u>Cluster VI: 101 expression groups, 208 domains</u></b> |       |       |    |
| Ga0196617_100009115                                          | GH43  | RCL01 | VI |
| Ga0196617_100009115                                          | CBM13 | RCL01 | VI |
| Ga0196617_100009115                                          | DOC1  | RCL01 | VI |
| Ga0196617_100009116                                          | GH81  | RCL01 | VI |
| Ga0196617_100009116                                          | DOC1  | RCL01 | VI |
| Ga0196617_100009142                                          | DOC1  | RCL01 | VI |
| Ga0196617_100009143                                          | CBM48 | RCL01 | VI |
| Ga0196617_100009158                                          | GH9   | RCL01 | VI |
| Ga0196617_100009158                                          | CBM3  | RCL01 | VI |
| Ga0196617_100009158                                          | DOC1  | RCL01 | VI |
| Ga0196617_100009159                                          | CBM30 | RCL01 | VI |
| Ga0196617_100009159                                          | GH9   | RCL01 | VI |
| Ga0196617_100009159                                          | GH44  | RCL01 | VI |
| Ga0196617_100009159                                          | DOC1  | RCL01 | VI |
| Ga0196617_100009159                                          | CBM44 | RCL01 | VI |
| Ga0196617_100009203                                          | GH9   | RCL01 | VI |

|                     |        |       |    |
|---------------------|--------|-------|----|
| Ga0196617_100009203 | CBM3   | RCL01 | VI |
| Ga0196617_100009203 | DOC1   | RCL01 | VI |
| Ga0196617_100009224 | CE4    | RCL01 | VI |
| Ga0196617_10000923  | GH9    | RCL01 | VI |
| Ga0196617_10000923  | CBM3   | RCL01 | VI |
| Ga0196617_10000923  | DOC1   | RCL01 | VI |
| Ga0196617_10000943  | DOC1   | RCL01 | VI |
| Ga0196617_100014143 | GH9    | RCL01 | VI |
| Ga0196617_100014143 | DOC1   | RCL01 | VI |
| Ga0196617_100014145 | GH5_55 | RCL01 | VI |
| Ga0196617_100014145 | CBM32  | RCL01 | VI |
| Ga0196617_100014145 | DOC1   | RCL01 | VI |
| Ga0196617_10001446  | DOC1   | RCL01 | VI |
| Ga0196617_10001451  | CBM22  | RCL01 | VI |
| Ga0196617_10001451  | GH10   | RCL01 | VI |
| Ga0196617_10001451  | CBM22  | RCL01 | VI |
| Ga0196617_10001451  | DOC1   | RCL01 | VI |
| Ga0196617_10001451  | CE1    | RCL01 | VI |
| Ga0196617_1000146   | CBM25  | RCL01 | VI |
| Ga0196617_10001484  | GH23   | RCL01 | VI |
| Ga0196617_100016107 | SLH    | RCL01 | VI |
| Ga0196617_100016107 | SLH    | RCL01 | VI |
| Ga0196617_10001684  | CBM22  | RCL01 | VI |
| Ga0196617_10001684  | GH10   | RCL01 | VI |
| Ga0196617_10001684  | DOC1   | RCL01 | VI |
| Ga0196617_10001939  | CE4    | RCL01 | VI |
| Ga0196617_10002318  | GH26   | RCL01 | VI |
| Ga0196617_10002318  | GH5_25 | RCL01 | VI |
| Ga0196617_10002318  | CBM11  | RCL01 | VI |
| Ga0196617_10002318  | DOC1   | RCL01 | VI |
| Ga0196617_10002394  | GH53   | RCL01 | VI |
| Ga0196617_10002394  | DOC1   | RCL01 | VI |
| Ga0196617_10002396  | GH74   | RCL01 | VI |
| Ga0196617_10002396  | DOC1   | RCL01 | VI |
| Ga0196617_100024103 | CBM3   | RCL01 | VI |
| Ga0196617_100024109 | SLH    | RCL01 | VI |
| Ga0196617_100024109 | SLH    | RCL01 | VI |
| Ga0196617_100024109 | SLH    | RCL01 | VI |
| Ga0196617_10002441  | GH133  | RCL01 | VI |
| Ga0196617_10002490  | GH48   | RCL01 | VI |
| Ga0196617_10002490  | CBM3   | RCL01 | VI |
| Ga0196617_10002537  | DOC1   | RCL01 | VI |
| Ga0196617_10002537  | DOC1   | RCL01 | VI |
| Ga0196617_100026113 | DOC1   | RCL01 | VI |

|                     |       |       |    |
|---------------------|-------|-------|----|
| Ga0196617_10002620  | GH10  | RCL01 | VI |
| Ga0196617_10002651  | GH48  | RCL01 | VI |
| Ga0196617_10002651  | DOC1  | RCL01 | VI |
| Ga0196617_10003325  | DOC1  | RCL01 | VI |
| Ga0196617_10003331  | CBM50 | RCL01 | VI |
| Ga0196617_10003331  | CBM50 | RCL01 | VI |
| Ga0196617_10003331  | GH18  | RCL01 | VI |
| Ga0196617_10003345  | GH15  | RCL01 | VI |
| Ga0196617_100035100 | CBM4  | RCL01 | VI |
| Ga0196617_100035100 | GH9   | RCL01 | VI |
| Ga0196617_100035100 | CBM3  | RCL01 | VI |
| Ga0196617_100035100 | DOC1  | RCL01 | VI |
| Ga0196617_100035101 | GH9   | RCL01 | VI |
| Ga0196617_100035101 | DOC1  | RCL01 | VI |
| Ga0196617_10003578  | DOC1  | RCL01 | VI |
| Ga0196617_10003578  | GH124 | RCL01 | VI |
| Ga0196617_10003580  | GH9   | RCL01 | VI |
| Ga0196617_10003580  | CBM3  | RCL01 | VI |
| Ga0196617_10003580  | DOC1  | RCL01 | VI |
| Ga0196617_10003956  | GH3   | RCL01 | VI |
| Ga0196617_10004017  | GH94  | RCL01 | VI |
| Ga0196617_10004018  | GH9   | RCL01 | VI |
| Ga0196617_10004018  | DOC1  | RCL01 | VI |
| Ga0196617_10004021  | CBM3  | RCL01 | VI |
| Ga0196617_10004022  | GH18  | RCL01 | VI |
| Ga0196617_10004022  | DOC1  | RCL01 | VI |
| Ga0196617_10004023  | GH8   | RCL01 | VI |
| Ga0196617_10004023  | DOC1  | RCL01 | VI |
| Ga0196617_10004025  | CBM3  | RCL01 | VI |
| Ga0196617_10004034  | DOC1  | RCL01 | VI |
| Ga0196617_10004046  | DOC1  | RCL01 | VI |
| Ga0196617_10004046  | CBM35 | RCL01 | VI |
| Ga0196617_10004053  | DOC1  | RCL01 | VI |
| Ga0196617_10004125  | CBM25 | RCL01 | VI |
| Ga0196617_10004148  | CBM35 | RCL01 | VI |
| Ga0196617_10004148  | CE12  | RCL01 | VI |
| Ga0196617_10004149  | CE12  | RCL01 | VI |
| Ga0196617_10004149  | DOC1  | RCL01 | VI |
| Ga0196617_1000447   | SLH   | RCL01 | VI |
| Ga0196617_1000447   | SLH   | RCL01 | VI |
| Ga0196617_1000447   | SLH   | RCL01 | VI |
| Ga0196617_10004476  | SLH   | RCL01 | VI |
| Ga0196617_10004476  | SLH   | RCL01 | VI |
| Ga0196617_10004476  | SLH   | RCL01 | VI |



|                    |        |       |    |
|--------------------|--------|-------|----|
| Ga0196617_1000451  | CBM6   | RCL01 | VI |
| Ga0196617_1000451  | DOC1   | RCL01 | VI |
| Ga0196617_1000452  | GH43   | RCL01 | VI |
| Ga0196617_1000452  | CBM6   | RCL01 | VI |
| Ga0196617_1000452  | DOC1   | RCL01 | VI |
| Ga0196617_10004521 | DOC1   | RCL01 | VI |
| Ga0196617_10004521 | CBM35  | RCL01 | VI |
| Ga0196617_1000453  | GH141  | RCL01 | VI |
| Ga0196617_1000453  | CBM6   | RCL01 | VI |
| Ga0196617_1000453  | DOC1   | RCL01 | VI |
| Ga0196617_10004533 | GH126  | RCL01 | VI |
| Ga0196617_10004546 | SLH    | RCL01 | VI |
| Ga0196617_10004546 | SLH    | RCL01 | VI |
| Ga0196617_10004546 | SLH    | RCL01 | VI |
| Ga0196617_1000455  | GH43   | RCL01 | VI |
| Ga0196617_1000455  | CBM6   | RCL01 | VI |
| Ga0196617_1000455  | DOC1   | RCL01 | VI |
| Ga0196617_10004553 | CBM3   | RCL01 | VI |
| Ga0196617_10004553 | GH5_1  | RCL01 | VI |
| Ga0196617_10004553 | DOC1   | RCL01 | VI |
| Ga0196617_1000458  | CBM48  | RCL01 | VI |
| Ga0196617_1000458  | GH13_9 | RCL01 | VI |
| Ga0196617_1000459  | CE9    | RCL01 | VI |
| Ga0196617_1000635  | GH9    | RCL01 | VI |
| Ga0196617_1000635  | DOC1   | RCL01 | VI |
| Ga0196617_10006355 | GH9    | RCL01 | VI |
| Ga0196617_10006355 | CBM3   | RCL01 | VI |
| Ga0196617_10006355 | DOC1   | RCL01 | VI |
| Ga0196617_10006356 | GH9    | RCL01 | VI |
| Ga0196617_10006356 | CBM3   | RCL01 | VI |
| Ga0196617_10006356 | CBM3   | RCL01 | VI |
| Ga0196617_10006356 | DOC1   | RCL01 | VI |
| Ga0196617_1000636  | CBM35  | RCL01 | VI |
| Ga0196617_1000636  | GH26   | RCL01 | VI |
| Ga0196617_1000636  | DOC1   | RCL01 | VI |
| Ga0196617_1000731  | SLH    | RCL01 | VI |
| Ga0196617_1000731  | SLH    | RCL01 | VI |
| Ga0196617_1000731  | SLH    | RCL01 | VI |
| Ga0196617_10007316 | GH94   | RCL01 | VI |
| Ga0196617_10008321 | CBM6   | RCL01 | VI |
| Ga0196617_1000954  | CBM22  | RCL01 | VI |
| Ga0196617_1000954  | GH10   | RCL01 | VI |
| Ga0196617_1000954  | DOC1   | RCL01 | VI |
| Ga0196617_1000961  | CBM4   | RCL01 | VI |

|                    |         |       |    |
|--------------------|---------|-------|----|
| Ga0196617_1000961  | GH9     | RCL01 | VI |
| Ga0196617_10009628 | DOC1    | RCL01 | VI |
| Ga0196617_1000968  | GH5_1   | RCL01 | VI |
| Ga0196617_1000968  | DOC1    | RCL01 | VI |
| Ga0196617_1000969  | CBM3    | RCL01 | VI |
| Ga0196617_10009710 | SLH     | RCL01 | VI |
| Ga0196617_10009729 | CBM50   | RCL01 | VI |
| Ga0196617_10010817 | GH23    | RCL01 | VI |
| Ga0196617_1001211  | CBM42   | RCL01 | VI |
| Ga0196617_1001211  | DOC1    | RCL01 | VI |
| Ga0196617_1001211  | GH43    | RCL01 | VI |
| Ga0196617_10012123 | CBM35   | RCL01 | VI |
| Ga0196617_10012123 | GH26    | RCL01 | VI |
| Ga0196617_10012123 | DOC1    | RCL01 | VI |
| Ga0196617_10012132 | GH9     | RCL01 | VI |
| Ga0196617_10012132 | CBM3    | RCL01 | VI |
| Ga0196617_10012132 | CBM3    | RCL01 | VI |
| Ga0196617_10012516 | GH9     | RCL01 | VI |
| Ga0196617_10012516 | CBM3    | RCL01 | VI |
| Ga0196617_10012516 | DOC1    | RCL01 | VI |
| Ga0196617_1001259  | GH5_1   | RCL01 | VI |
| Ga0196617_1001259  | DOC1    | RCL01 | VI |
| Ga0196617_10012616 | GH94    | RCL01 | VI |
| Ga0196617_10012633 | CBM50   | RCL01 | VI |
| Ga0196617_10012633 | CBM50   | RCL01 | VI |
| Ga0196617_10012633 | CBM50   | RCL01 | VI |
| Ga0196617_10012633 | CBM50   | RCL01 | VI |
| Ga0196617_10012634 | CBM50   | RCL01 | VI |
| Ga0196617_10012634 | CBM50   | RCL01 | VI |
| Ga0196617_10012634 | CBM50   | RCL01 | VI |
| Ga0196617_10012713 | DOC1    | RCL01 | VI |
| Ga0196617_10012729 | GH18    | RCL01 | VI |
| Ga0196617_1001275  | GH5_1   | RCL01 | VI |
| Ga0196617_1001275  | DOC1    | RCL01 | VI |
| Ga0196617_1001361  | CE3     | RCL01 | VI |
| Ga0196617_1001361  | CE3     | RCL01 | VI |
| Ga0196617_1001361  | DOC1    | RCL01 | VI |
| Ga0196617_1001363  | GH5_4   | RCL01 | VI |
| Ga0196617_1001363  | DOC1    | RCL01 | VI |
| Ga0196617_1001363  | CE2     | RCL01 | VI |
| Ga0196617_1001365  | CBM34   | RCL01 | VI |
| Ga0196617_1001365  | GH13_20 | RCL01 | VI |
| Ga0196617_10013921 | GH1     | RCL01 | VI |
| Ga0196617_10014123 | CE14    | RCL01 | VI |

|                     |       |       |    |
|---------------------|-------|-------|----|
| Ga0196617_1001491   | SLH   | RCL01 | VI |
| Ga0196617_1001491   | SLH   | RCL01 | VI |
| Ga0196617_1001492   | SLH   | RCL01 | VI |
| Ga0196617_1001492   | SLH   | RCL01 | VI |
| Ga0196617_10015133  | DOC1  | RCL01 | VI |
| Ga0196617_10019617  | GH9   | RCL01 | VI |
| Ga0196617_10019617  | CBM3  | RCL01 | VI |
| Ga0196617_10019617  | CBM3  | RCL01 | VI |
| Ga0196617_10019617  | DOC1  | RCL01 | VI |
| Ga0196617_1002189   | DOC1  | RCL01 | VI |
| Ga0196617_1002189   | CBM35 | RCL01 | VI |
| Ga0196617_1002401   | CBM3  | RCL01 | VI |
| Ga0196617_1005678   | CE7   | RCL01 | VI |
| Ga0196617_1008651   | GH2   | RCL01 | VI |
| Ga0196617_1008651   | CBM6  | RCL01 | VI |
| Ga0196617_100012177 | CBM50 | TISS1 | VI |

63 **Supplementary Table 6. Genome IMG ID and SRA numbers for datasets used in this**  
 64 **study**

| Dataset                       | SRA Accession number | IMG Genome ID |
|-------------------------------|----------------------|---------------|
| <b>Metagenomes</b>            |                      |               |
| SEM1b_D1B                     | SRX3777359           | 3300019285    |
| SEM1b_D2B                     | SRX3777360           | 3300019285    |
| SEM1b_D1B-r1 (16S rRNA)       | SRX3777358           |               |
| SEM1b_D2B-r1 (16S rRNA)       | SRX3777363           |               |
| SEM1b_D1B-r2 (16S rRNA)       | SRX3777361           |               |
| SEM1b_D2B-r2 (16S rRNA)       | SRX3777362           |               |
| <b>Isolate genomes</b>        |                      |               |
| <i>C. proteolyticus BWF2A</i> | SRX3783215           | 2731957509    |
| <i>C. proteolyticus SW3C</i>  | SRX3783214           | 2731957514    |
| <b>SEM1b time series</b>      |                      |               |
| Dataset                       | Metatranscriptomes   | 16S rRNA      |
| SEM1b_T1A                     |                      | SRX3777365    |
| SEM1b_T1B                     |                      | SRX3777364    |
| SEM1b_T1C                     |                      | SRX3777357    |
| SEM1b_T2A                     | SRX3777356           | SRX3777346    |
| SEM1b_T2B                     | SRX3777345           | SRX3777348    |
| SEM1b_T2C                     | SRX3777347           | SRX3777350    |
| SEM1b_T3A                     | SRX3777349           | SRX3777352    |
| SEM1b_T3B                     | SRX3777351           | SRX3777354    |
| SEM1b_T3C                     | SRX3777353           | SRX3777368    |
| SEM1b_T4A                     | SRX3777369           | SRX3777370    |
| SEM1b_T4B                     | SRX3777371           | SRX3777372    |
| SEM1b_T4C                     | SRX3777373           | SRX3777374    |
| SEM1b_T5A                     | SRX3777375           | SRX3777366    |
| SEM1b_T5B                     | SRX3777367           | SRX3777344    |
| SEM1b_T5C                     | SRX3777343           | SRX3777342    |
| SEM1b_T6A                     | SRX3777341           | SRX3777340    |
| SEM1b_T6B                     | SRX3777339           | SRX3777338    |
| SEM1b_T6C                     | SRX3777337           | SRX3777336    |
| SEM1b_T7A                     | SRX3777335           | SRX3777384    |
| SEM1b_T7B                     | SRX3777385           | SRX3777382    |
| SEM1b_T7C                     | SRX3777383           | SRX3777380    |
| SEM1b_T8A                     | SRX3777381           | SRX3777378    |
| SEM1b_T8B                     | SRX3777379           | SRX3777376    |
| SEM1b_T8C                     | SRX3777377           | SRX3777355    |

65  
66

67 **REFERENCES.**

68

69 Azizi A, Kim W, Lee JH (2016). Comparison of microbial communities during the anaerobic  
70 digestion of Gracilaria under mesophilic and thermophilic conditions. *World Journal of*  
71 *Microbiology and Biotechnology* **32**: 1-17.

72

73 Chen Y, Zhang F, Wang T, Shen N, Yu ZW, Zeng RJ (2016). Hydraulic retention time affects  
74 stable acetate production from tofu processing wastewater in extreme-thermophilic  
75 (70 °C) mixed culture fermentation. *Bioresource Technology* **216**: 722-728.

76

77 Chen Y, Xiao K, Jiang X, Shen N, Zeng RJ, Zhou Y (2017). In-situ sludge pretreatment in a  
78 single-stage anaerobic digester. *Bioresource Technology* **238**: 102-108.

79

80 Fitamo T, Treu L, Boldrin A, Sartori C, Angelidaki I, Scheutz C (2017). Microbial population  
81 dynamics in urban organic waste anaerobic co-digestion with mixed sludge during a  
82 change in feedstock composition and different hydraulic retention times. *Water Research*  
83 **118**: 261-271.

84

85 Gagliano MC, Braguglia CM, Gianico A, Mininni G, Nakamura K, Rossetti S (2015).  
86 Thermophilic anaerobic digestion of thermal pretreated sludge: Role of microbial  
87 community structure and correlation with process performances. *Water Research* **68**: 498-  
88 509.

89

90 Hagen LH, Frank JA, Zamanzadeh M, Eijsink VGH, Pope PB, Horn SJ *et al* (2017).  
91 Quantitative metaproteomics highlight the metabolic contributions of uncultured  
92 phylotypes in a thermophilic anaerobic digester. *Applied and Environmental Microbiology*  
93 **83**.

94

95 Ho D, Jensen P, Gutierrez-Zamora ML, Beckmann S, Manefield M, Batstone D (2016). High-  
96 rate, high temperature acetotrophic methanogenesis governed by a three population  
97 consortium in anaerobic bioreactors. *PLoS ONE* **11**: 1-13.

98

99 Kobayashi T, Li YY, Harada H (2008). Analysis of microbial community structure and  
100 diversity in the thermophilic anaerobic digestion of waste activated sludge. *Water Science*  
101 *and Technology* **57**: 1199-1205.

102

103 Kouzuma A, Tsutsumi M, Ishii Si, Ueno Y, Abe T, Watanabe K (2017). Non-autotrophic  
104 methanogens dominate in anaerobic digesters. *Scientific Reports* **7**: 1-13.

105

106 Lü F, Bize A, Guillot A, Monnet V, Madigou C, Chapleur O *et al* (2014). Metaproteomics of  
107 cellulose methanisation under thermophilic conditions reveals a surprisingly high  
108 proteolytic activity. *ISME Journal* **8**: 88-102.

109

110 Pervin HM, Dennis PG, Lim HJ, Tyson GW, Batstone DJ, Bond PL (2013). Drivers of microbial  
111 community composition in mesophilic and thermophilic temperature-phased anaerobic  
112 digestion pre-treatment reactors. *Water Research* **47**: 7098-7108.  
113  
114 Sun W, Yu G, Louie T, Liu T, Zhu C, Xue G *et al* (2015). From mesophilic to thermophilic  
115 digestion: the transitions of anaerobic bacterial, archaeal, and fungal community structures  
116 in sludge and manure samples. *Applied Microbiology and Biotechnology* **99**: 10271-10282.  
117  
118 Yu B, Lou Z, Zhang D, Shan A, Yuan H, Zhu N *et al* (2015). Variations of organic matters and  
119 microbial community in thermophilic anaerobic digestion of waste activated sludge with  
120 the addition of ferric salts. *Bioresour Technol* **179**: 291-298.  
121  
122
